1 **Molecular basis of the logical evolution of the novel coronavirus SARS-CoV-2: A**  
2 **comparative analysis**

3 Abhisek Dwivedy<sup>1</sup>, Krushna Chandra Murmu<sup>2</sup>, Mohammed Ahmad<sup>1</sup>, Punit Prasad<sup>2</sup>, Bichitra  
4 Kumar Biswal<sup>1</sup> and Palok Aich\*<sup>3</sup>

5  
6 <sup>1</sup> *National Institute of Immunology, Aruna Asaf Ali Marg, New Delhi, 110067, India;*  
7 *bbiswal@nii.ac.in*

8 <sup>2</sup> *Institute of Life Sciences, NALCO Square, Bhubaneswar, 751023, Odisha, India;*  
9 *punit.ils@gov.in*

10 <sup>3</sup> *School of Biological Sciences, National Institute of Science Education and Research*  
11 *(NISER), HBNI, PO: Jatni, Khurda, 752050, Odisha, India; palok.aich@niser.ac.in*

12 \* Correspondence: palok.aich@niser.ac.in; Tel.: +91-9937299100

13  
14 **Abstract:** A novel disease, COVID-19, is sweeping the world since end of 2019. While in  
15 many countries, the first wave is over, but the pandemic is going through its next phase with  
16 a significantly higher infectability. COVID-19 is caused by the novel Severe Acute  
17 Respiratory Syndrome Coronavirus 2 (SARS-CoV-2) that seems to be more infectious than  
18 any other previous human coronaviruses. To understand any unique traits of the virus that  
19 facilitate its entry into the host, we compared the published structures of the viral spike  
20 protein of SARS-CoV-2 with other known coronaviruses to determine the possible  
21 evolutionary pathway leading to the higher infectivity. The current report presents unique  
22 information regarding the amino acid residues that were a) conserved to maintain the  
23 binding with ACE2 (Angiotensin-converting enzyme 2), and b) substituted to confer an  
24 enhanced binding affinity and conformational flexibility to the SARS-CoV-2 spike protein.  
25 The present study provides novel insights into the evolutionary nature and molecular basis  
26 of higher infectability and perhaps the virulence of SARS-CoV-2.

27 **Keywords:** COVID-19; SARS coronavirus; evolution & virulence; spike protein; sequence  
28 and structural analyses

29  
30 **1. Introduction**

31 None of the recent outbreak like, SARS, HIV, Swine flu, could match the current pandemic  
32 COVID-19 except perhaps the flu pandemic that occurred over 100 years ago (Ashour et al.,  
33 2020). COVID-19 claimed around 54 million infections and over 1 million deaths globally  
34 while writing this report (WHO, 2020). SARS-CoV-2, unlike many other viruses, can be  
35 spread by asymptomatic individuals (Andersen et al., 2020; Ashour et al., 2020). Elucidating  
36 the molecular and cellular bases of the viral infection would enhance the understanding of the  
37 virulence of the virus.

38 Besides major damage to the respiratory system following SARS-CoV-2 infection, other  
39 important associations of the disease are neurological defects (overtly loss of taste and  
40 renal failure, coagulopathy and vascular disease along with many other conditions (Jin et al.,  
41 2020; Rothan and Byrareddy, 2020). A genome-wide association study linked an increased  
42 susceptibility to the COVID-19 in patients with blood group A and in males (Zhao et al.,  
43 2020). Among co-morbidities, hypertension and diabetes are the main concerns. In addition,  
44 the virus itself presents some intrinsic yet unknown features to enhance its virulence like- a)  
45 proof-reading mechanism(s) to protect itself from external adverse effects and agents; b) a  
46 larger genome, thrice that of HCV and double that of influenza virus (Benvenuto et al.,  
47 These along with many other molecular features of SARS-CoV-2 have made the specificity

48 and affinity of its spike protein, for ACE2 of the human host, significantly higher (Walls et  
49 2020). The higher affinity, dynamic rearrangement, and specificity of the SARS-CoV-2  
50 spike protein for ACE2 are among the key factors that might have made the virus more  
51 virulent (Yan et al., 2020). The pertinent question is how it acquired such potential and  
52 precise machinery within a short span, following the SARS-CoV and MERS-CoV  
53 that took place in 2003 and 2012. We, therefore, attempted to understand the evolution of  
54 coronavirus of various kinds, with special emphasis on SARS-CoV, MERS-CoV and  
55 SARS-CoV-2 to determine cues on the evolutionary dynamics that have enhanced the  
56 virulence and infectivity of SARS-CoV-2. We have analyzed the amino acid sequences of  
57 Spike proteins of 45 relevant coronaviruses and the structural features of select ones to  
58 understand the major differences that might explain the increased binding efficiency of the  
59 SARS-CoV-2 spike proteins to human ACE2. The Spike proteins from coronaviruses  
60 into two distinct fragments, S1 and S2. Fragment S1 is involved in recognition of host cell  
61 surface receptors, and the fragment S2 is involved in generation of the pre-fusion complex.  
62 Fragment S1 is comprised of two major domains- N-terminal (NTD) and C-terminal (CTD)  
63 domains (Li, 2016). Collectively, NTD and CTD are also known as the receptor binding  
64 domain (RBD). The CTD interacts with molecules like ACE2 and CD26, in case of  
65 SARS-CoV/CoV-2 and MERS/Bat-CoV, respectively. The NTD is known to recognize  
66 sugar containing molecules and cell adhesion molecules (Li, 2016; Sun et al., 2020). The  
67 physiological state of the Spike proteins is comprised of a homo-trimer with a central  
68 three-fold symmetry with the three S1 fragments sitting atop the respective membrane  
69 anchored S2 fragments (Figure 1A) (Li, 2016). We validated the protein structural data by  
70 analyzing the differences in the coding nucleotide sequences. The results showed the  
71 plausible mutations that act as the driving force in the natural selection of SARS-CoV-2.

## 72 **2. Materials and Methods**

### 73 **2.1 Protein Sequence and Structure analysis**

74 The sequences of 45 Coronavirus Spike proteins were retrieved from the SwissProt  
75 database. The details of the sequences are presented in Table S1. The sequences were  
76 aligned using Clustal Omega (Sievers and Higgins, 2014) and a maximum likelihood  
77 phylogenetic tree was generated using the NEXUS algorithm (Giribet, 2005). The sequence  
78 alignments were represented using Esript 3.0 (Gouet et al., 2005).

79 The 3-D structures of Spike Proteins (native proteins, Fragment S1- C-terminal  
80 domains in complex with host receptors) from SARS-CoV-2 (IDs- 6VYB, 6M0J),  
81 SARS-CoV (IDs- 5XLR, 3SCI), MERS-CoV (ID- 4L72), Bat Coronavirus HKU14 (ID-  
82 4QZV) and Bovine Coronavirus (ID- 4H14) were retrieved from the Protein Data Bank.  
83 Multiple structure alignments were performed at the POSA web server (Li et al., 2014) using  
84 both flexible and rigid body algorithms. Two structure alignments were performed at the  
85 FATCAT web server (Veeramalai et al., 2008) using both flexible and rigid body algorithms.  
86 Complex of Fragment S1- C-terminal domains with the ACE2 binding domain were  
87 generated using the ZDOCK web server (Pierce et al., 2014) and the complexes generated  
88 were refined using the GalaxyRefineComplex web server (Heo et al., 2016). Interaction and  
89 binding properties of Spike proteins' C-terminal domains with host receptor proteins were  
90 predicted using the PRODIGY web server (Xue et al., 2016). Surface area of interactions  
91 between Spike proteins' C-terminal domains with host receptor proteins were determined

92 using the InterProSurf (Negi et al., 2007) and the PISA (Baskaran et al., 2014) web servers.  
93 *In silico* alanine scanning mutagenesis for the protein-protein complexes were performed at  
94 the DrugScore<sup>PPI</sup> (Krüger and Gohlke, 2010), the SpotOn (Moreira et al., 2017) and the  
95 mCSM-PPI2 web servers (Rodrigues et al., 2019). Pymol 2.3 was used for structural  
96 visualizations (DeLano, 2020).

## 97 **2.2 Nucleotide sequence analysis**

98 45 nucleotide sequences of the coronavirus Spike proteins were retrieved from NCBI  
99 nucleotide database. The details of the sequences are presented in Table S1. The sequences  
100 were aligned using MEGA X software (Kumar et al., 2018) with MUSCLE (Edgar, 2004) as  
101 the alignment algorithm using the default parameters. Post alignment, a distance matrix was  
102 calculated from the aligned output followed by both neighbour joining (NJ) and unweighted  
103 pair group method with arithmetic mean (UPGMA) methods. Following this, distance matrix  
104 calculator for maximum Parsimony and Maximum likelihood analyses were performed. The  
105 phylogenetic trees were generated using the R-package “ggtree” of Bioconductor including  
106 the genera and host of the respective coronavirus (Yu et al., 2017). For maximum likelihood  
107 we estimated the best model using the modelTest function from the “phangorn package”  
108 (Posada and Crandall, 1998). GTR+G+I was selected as the model to perform Maximum  
109 likelihood phylogenetic tree with 100 iterations. The sequence alignments were represented  
110 using Esript 3.0. The ancestry and substitution analysis were performed using MEGA X.

## 111 **2.3 Dendrogram comparison analysis**

112 Aligned amino acid and nucleotide sequences were assigned the same names in both  
113 the alignments for comparison. The phylogenetic distances were calculated for UPGMA  
114 using the “phangorn library” (Schliep, 2011). The best model was calculated for both  
115 nucleotide and amino acid sequences using the “modelTest” function where the “Akaike  
116 Information Criterion” (Ingram and Mahler, 2013) was applied to determine the best model  
117 for both trees and then each tree was converted into a dendrogram using “as.dendrogram”  
118 function. These dendrograms were further taken for dendrogram comparison using the  
119 “dendextend tanglegram function” (Galili, 2015). Tree distance was calculated using  
120 “treedist” function (Smith, 2020).

## 121 **2.4 Synonymous and non-synonymous mutation analysis**

122 For synonymous and non-synonymous mutation analysis, the 45 nucleotide sequence  
123 files in which the headers were labelled same as the respective amino acid sequences were  
124 used. Using the reverse align function the nucleotide sequences were reverse aligned by  
125 seqinr library (Charif and Lobry, 2007). The webserver RevTrans 1.4 (Wernersson and  
126 Pedersen, 2003) was used to generate amino acid/codon based alignment of nucleotide  
127 sequences. The codon aligned sequences were used to determine the synonymous ( $K_a$ ) and  
128 non-synonymous ( $K_s$ ) substitutions. By using these values, we evaluated the  $dN$ ,  $dS$  and  
129  $dN/dS$  value matrices. These matrices were further used for visualization of the sequence  
130 clustering using heatmaps. “Ward D2” was used as the clustering algorithm to cluster the  
131 samples into the genera and primary hosts of the respective virus.

## 132 **3. Results**

133 **3.1 SARS-CoV-2** has both structural and functional similarities with the previous human  
134 coronaviruses but with much higher infectivity and lower morbidity (Walls et al., 2020). It is  
135 further noted that besides the similar host recognition molecules, SARS-CoV-2 has a higher  
136 affinity and a tighter binding with the human cellular receptor (Wrapp et al., 2020; Yan et al.,

137 2020). These two features of SARS-CoV-2 prompted us to ask an important and obvious  
138 question- how and when did the novel coronavirus emerge to be a distinct lineage in terms of  
139 its enhanced infectability? What are the molecular markers that can be analyzed to  
140 understand the molecular basis of the stronger affinity and higher infectability? In the current  
141 report, we investigated these questions by- a) comparing the protein structures of spike  
142 proteins from SARS-CoV, MERS-CoV, SARS-CoV-2 and other related Bat-CoVs; b)  
143 establishing the similarity and differences in major amino acid residues to understand the  
144 higher affinity of SARS-CoV-2 towards ACE2 binding compared to other coronaviruses;  
145 and c) comparing the nucleotide and amino acid sequences of spike proteins to estimate the  
146 most probable evolutionary trend.

### 147 **3.1.1. A comparison both at the sequence and structure levels of the coronavirus Spike** 148 **proteins**

149 A multiple sequence alignment of 45 experimentally verified Spike proteins sequences from  
150 several species of coronaviruses showed a significant difference in the conservation status of  
151 the two fragments S1 and S2 (Supplementary File S1). The fragment S2 (aa 662-1272 for  
152 SARS-CoV-2) exhibited a significantly higher sequence conservation, with 76 amino acids  
153 strictly conserved across species. However, the fragment S1 (aa1-aa661 for SARS-CoV-2)  
154 exhibited an unusually low conservation with only 10 strictly conserved residues, possibly  
155 attributed to the wide repertoire of the host receptor molecules recognized by this domain (Li,  
156 2016). The amino acid cysteine displayed the highest conservation across all sequences, at 16  
157 different positions across the length of the sequences. Spike proteins form various inter- and  
158 intra-molecular di-sulphide bonds in order to stabilize the core monomeric structure as well  
159 the physiological homo-trimeric form (Li, 2016). A recent study by Wang et al. on the crystal  
160 structure of the SARS-CoV-2 Spike Protein CTD in complex with human ACE2, established  
161 the residues of CTD ( K417, G446, Y449, Y453, L455, F456, Y473, A475, G476, E484,  
162 F486, N487, Y489, F490, Q493, G496, Q498, T500, N501, G502, and Y505) that interact  
163 with the human ACE2 (Figure S1) (Wang et al., 2020). Of these 21 residues, only 8 residues  
164 (Y436, Y440, N474, Y475, Y484, T486, G488, and Y491) are conserved in the  
165 SARS-CoV CTD.

166 In order to investigate the evolutionary divergence of the Spike protein, we generated an  
167 evolutionary tree (Figure S2). Interestingly, of the seven known human coronaviruses, the  
168 three coronavirus species associated with higher infectivity and morbidities, i.e.,  
169 SARS-CoV, MERS-CoV and SARS-CoV-2 formed a distinct evolutionary cluster. Notably,  
170 the other members of these clusters were overtly the bat coronavirus species. Such a specific  
171 clustering suggests a possible co-evolution in the Spike proteins of humans and bat  
172 coronaviruses that led to the association with more severe infections.

### 173 **3.1.2 Comparison of the 3-D structures of the Spike proteins reveals residues critical** 174 **for ACE2 binding**

175 This association of functional features prompted an investigation into the structural  
176 similarities of the spike proteins from aforementioned human coronaviruses associated with  
177 high fatality and bat coronavirus. While the spike proteins SARS-CoV-2 and SARS-CoV  
178 displayed an overall conservation of the protein structure (Figure S3 A), the CTD domain of  
179 the SARS-CoV-2 is relatively compact and contains, unlike SARS-CoV, an extended

180 long loop. (Figure S3 B & C). Notably, most of the  $\beta$ -strands of the central sheet in  
181 SARS-CoV-2 CTD are longer in size than that of the corresponding sheet in SARS-CoV.  
182 The scenario is however much different in other coronaviruses. Particularly, the CTD of  
183 Bat-CoV and MERS-CoV are larger with an anti-parallel  $\beta$ -sheet replacing the loop like  
184 structures of the ACE2 recognizing region of the CTD of SARS-CoV-2 (Figure S4). This  
185 comparative structural analysis hinted at a divergent evolution of the CTDs into two  
186 independent lineages- a) MERS-CoV and b) SARS-CoV-2. We also found that the core  
187 structure of the NTDs of the SARS-CoV-2 spike protein and the lectin binding NTD of  
188 Bov-CoV (Bovine Coronavirus) spike protein are largely similar (Figure S5). Taken  
189 together, the results suggest that the evolution of the host receptor recognizing domain in the  
190 coronavirus spike proteins are more local in nature while the global architecture demonstrate  
191 significant conservation (Figure 1B).

192 To explore these subtle evolutionary changes, we probed into the local architecture of the  
193 interfaces of SARS-CoV-2 CTD/hACE2 and SARS-CoV CTD/hACE2 complexes  
194 reported in the cryo-EM determined structures (Figure 1C) (Wrapp et al., 2020). Our  
195 analyses led to important findings that could help not only understanding the evolution and  
196 origin of the SARS-CoV-2 but also will help in developing potential intervention. Apart  
197 from the two small  $\beta$ -strands present in the SARS-CoV-2 CTD, the interfaces in the  
198 complexes were primarily lined up with loop like structures from the CTD of the spike  
199 protein and the N-terminal helix of the ACE2 (Figure 1D). It is important to note that  
200 SARS-CoV-2 CTD has 21 residues that interact with ACE2 N-terminal helix, while the  
201 SARS-CoV CTD has only 17 interacting residues. A closer inspection of the amino acid  
202 residues, involved in the interactions, suggested that residues Y453, Y473, G476 and F486  
203 from SARS-CoV-2 CTD were crucial towards providing a stronger interaction with ACE2,  
204 with no identical residues from SARS-CoV in the respective molecular environment (Figure  
205 2A). In order to determine any evolutionary correlation, the MERS-CoV and Bat-CoV CTDs  
206 were docked onto N-terminal helix region of the ACE2 followed by *in silico* energy  
207 minimization of the complexes. The MERS-CoV and Bat-CoV CTDs exhibited 18 and 19  
208 residues interacting with ACE2 N-terminal helix, respectively (Figure 2B & 2C). Notably,  
209 the Y453 of SARS-CoV-2 superimposed with the identical interacting residues Y499 and  
210 Y503 from MERS-CoV and Bat-CoV CTDs, respectively in the molecular  
211 microenvironment (Figure 2B & 2C). In order to understand the contribution of each  
212 interacting residue of the CTDs in ACE2 binding, *in silico* alanine scanning mutagenesis  
213 analysis was performed. While Y453 of SARS-CoV-2 contributed  $2.018 \text{ kcal mol}^{-1}$ , F486  
214 contributed  $3.01 \text{ kcal mol}^{-1}$  to the interaction. Interestingly, Y499 and Y503 of MERS-CoV  
215 and Bat-CoV CTDs contributed significantly higher to their respective interactions-  $2.877$   
216 and  $3.017 \text{ kcal mol}^{-1}$ , respectively (Figure 2D). Also, a significant rise was observed in the  
217 dissociation constants ( $K_d$ ) of binding with the ACE2 following alanine mutations of the  
218 aforementioned residues (Figure 2D). These energy values suggest the spatial conservation  
219 of this tyrosine residue in the CTD of SARS-CoV-2 being key to a stronger ACE2 binding,  
220 which is completely absent in the CTD of SARS-CoV.

221 A comparison of the *in silico* binding properties of the four aforementioned CTDs with the  
222 ACE2 revealed that despite a higher  $K_d$  for SARS-CoV-2, there was a significant decrease in



223 the surface area of interaction, suggesting a higher specificity of interaction between residues  
224 of the CTD and the ACE2 N-terminal helix (Table 1). It is also worth noticing that while the  
225 interacting residues are widely spread across the interacting surface of the SARS-CoV CTD.  
226 However, for SARS-CoV-2 CTD the interactions localize on the far ends of the interacting  
227 surface (Figure S6 A-D). This phenomenon is crucial as the central region of the interacting  
228 surface is primarily comprised of uncharged residues that arch away from the N-terminal  
229 helix of the ACE2 in both SARS-CoV-2 and SARS-CoV CTDs. In a stark contrast, majority  
230 of the interacting residues in MERS-CoV and Bat-CoV CTDs were localized in the central  
231 region of the interacting surfaces. This observation further hinted at a divergent evolution,  
232 resulting in the formation of the  $\beta$ -sheet protruding out of the region in case of MERS-CoV  
233 and Bat-CoV CTDs, as opposed to loop like structures in SARS-CoV-2 and SARS-CoV  
234 CTDs.

### 235 **3.1.3. Maximum Likelihood and Parsimony analyses of the Spike protein nucleotide** 236 **sequences at a glance**

237 The nucleotide sequences of the spike proteins were aligned. The results were plotted for  
238 both maximum parsimony (Figure S7A) and maximum likelihood (Figure S7B) trees. The  
239 amino acid phylogenetic analysis showed a significant cluster overlapping among  
240 SARS-CoV (P59594), MERS-CoV (K9N5Q8) and SARS-CoV-2 (P0DTC2). These  
241 coronaviruses already established high morbidities in humans. These groups of  
242 coronaviruses cluster separately with several Bat-CoVs as observed in the amino acids  
243 sequences phylogenetic tree. Comparison of the Parsimony and Maximum likelihood  
244 analyses and the structural data together established the facts that SARS-CoV, Bat-CoV,  
245 MERS-CoV and SARS-CoV-2 belong to a similar functional, structural and evolutionary  
246 cluster. A similar pattern was observed in case of nucleotide phylogenetic analysis where the  
247 aforementioned coronaviruses form a distinct cluster. A co-phylogenetics analysis was  
248 performed to compare the nucleotide and amino acid sequence dendrograms (Figure 3). The  
249 trees exhibited an entanglement score of 0.22, with a topological distance of 1.548986. The  
250 treedist analysis suggested a symmetric difference score of 60.000000; branch score  
251 difference of 1.764349; path difference of 166.679333; and quadratic path difference of  
252 20.924544, suggesting that trees are near identical despite the noticeable differences in the  
253 evolutionary lineages. The Baker's Gamma correlation coefficient (Baker, 1974) was  
254 calculated to be 0.4489648 and the Cophenetic correlation (Lapointe and Legendre, 1995)  
255 between amino and nucleotide trees the value was found 0.8245775. These values suggest a  
256 significant similarity between the two trees. Taken together, these analyses suggest that  
257 majority of the changes observed in the nucleotide sequences were pronounced in the  
258 difference in amino acids, with a negligible codon bias.

### 259 **3.1.4 Estimating the selection pressure on Spike proteins**

260 We sought to investigate the possible selection pressure on the Spike proteins genes,  
261 particularly targeting the SARS-CoV-2 Spike protein. The numbers of non-synonymous  
262 substitutions ( $dN$ ) between species, and the number of synonymous substitutions ( $dS$ )  
263 between species were calculated and used to determine the ratio of  $dN$  and  $dS$  (Rocha et al.,  
264 2006). A higher  $dN$  is associated with a positive selection, suggesting that associated  
265 mutations not only cause increased fitness but also indicate a recent divergence in species.

266 Concurrently, a higher  $dS$  is indicative of a purifying selection, that remove deleterious  
267 mutations which reduced fitness. We estimated the  $dN$  and  $dS$  values for the set of 45 Spike  
268 proteins' polypeptide sequences. While the  $dN$  values varied between -6 to 2, a significant  
269 proportion of the clusters depicted value greater than 1, suggesting higher number of  
270 non-synonymous substitutions across the spike protein sequences (Figure S8). More  
271 importantly, the  $dS$  values varied from -4 to 4 (Figure S9) with a majority of the values being  
272 less than 1. Such a distribution of  $dS$  values indicated that purifying selection in Spike  
273 proteins is limited to a small section of the coronaviruses. In stark contrast to the overall  
274 higher  $dN$  scores, it was strikingly low within SARS-CoV-2, SARS-CoV, and Bat-CoV  
275 suggesting a negligible positive selection. In concurrence, the  $dS$  scores within the  
276 aforementioned Spike proteins, suggested a possibly weak purifying selection. However, the  
277 comparison of MERS-CoV with SARS-CoV-2, SARS-CoV, and Bat-CoV suggested a  
278 strong positive selection as was evident from the high  $dN$  and the low  $dS$  values. In order to  
279 further understand the nature of selection pressures on Spike protein, the ratios of  $dN$  to  $dS$   
280 were estimated. The ratios revealed a distribution range from -4 to 4 and presented an  
281 interesting scenario (Figure 4), suggesting a mild purifying selection driving the Spike  
282 protein evolution in SARS-CoV-2 and a strong positive selection in case of MERS-CoV. In  
283 addition, the comparison also suggested that the divergence of MERS-CoV could be an  
284 evolutionarily recent event while the evolution of SARS-CoV-2 might have occurred over a  
285 comparatively longer time span.

### 286 **3.1.5 A comparison of the amino acids and nucleotide sequences of the coronavirus** 287 **Spike proteins**

288 To better understand the aforementioned evolutionary conundrum, we closely examined the  
289 protein (Figure S10) and nucleotide (Figure S11) sequence of CTDs of five Spike protein  
290 sequences - SARS-CoV-2, SARS-CoV, MERS-CoV, and Bat-CoV (all belonging to the  
291 sub-genus Sarbecovirus) (Table S2). The CTDs of these Spike proteins exhibited 25  
292 conserved residues. The CTDs of MERS-CoV and Bat-CoV are evidently longer and shorter,  
293 respectively in comparison to the SARS-CoV and SARS-CoV-2 CTDs. The theoretical pI for  
294 the CD26 binding CTDs is around 5 suggesting an abundance of negatively charged amino  
295 acids. However, the ACE2 binding CTDs have a theoretical pI greater than 8, suggesting a  
296 higher proportion positively charged residues. However, despite containing equivalent  
297 proportions of aromatic amino acids, the MERS-CoV CTD is significantly more  
298 hydrophobic than the others. Notably, ACE2 is localized strictly on the cell membranes,  
299 whereas DPP4 localizes on the cell membrane as well as in the cytoplasmic and extracellular  
300 fluids. The differential location of targeting receptors might be the possible reason for the  
301 lower infectivity of MERS-CoV despite having a significantly higher mortality. A  
302 comparison of the Spike Protein CTD coding sequences revealed that the SARS-CoV,  
303 MERS-CoV, and Bat-CoV had a higher GC content (~39%) than the SARS-CoV-2 (~34%).  
304 This in turn was evident from the comparison of the codon usage of the SARS-CoV-2 Spike  
305 protein wherein a significantly higher proportion of amino acids were encoded by the AT rich  
306 codons (Figure S12).

307 Further, we closely examined the binding regions of the four CTDs, emphasising specifically  
308 on the evolution of Y453 (Figures 5A & 5B). The residues 449-456 of the Spike Protein from  
309 SARS-CoV-2 are Asn-Tyr-Leu-Tyr-Arg-Leu-Phe-Arg. The aligned residues for this stretch

310 from SARS-CoV are Asn-Tyr-Lys-Tyr-Arg-Tyr-Leu-Arg. The triad Tyr-Arg-Tyr in  
311 SARS-CoV generate a strong steric hindrance causing both the tyrosine residues to remain  
312 buried within the CTD (Figure 2A, middle panel). Interestingly, mutating the second tyrosine  
313 a similar yet smaller amino acid leucine (Tyr-Arg-Leu) in SARS-CoV-2 reduces the steric  
314 hindrance (Figure 2A, top panel). This allowed the otherwise buried Tyr453 to interact with  
315 amino acids from ACE2, resulting in an enhanced binding. However in MERS-CoV and  
316 Bat-CoV, these triads are present as Tyr-Ile-Asn and Tyr-Arg-Ser, respectively. This  
317 decrease in hydrophobicity significantly reduces the binding affinity of MERS-CoV and  
318 Bat-CoV spike proteins with ACE2 under physiological condition. However, this in turn  
319 enables it to bind CD26 with a stronger affinity, suggesting a positive selection. Taken  
320 together; the removal of the second tyrosine from the triad to a weakly hydrophobic and  
321 smaller amino acid suggests a purifying selection in the SARS-CoV-2 Spike protein.

322

#### 323 **4. Discussion**

324 Although there are several reports on the evolutionary and outbreak trends of  
325 SARS-CoV-2 (Acter et al., 2020; Holmes and Rambaut, 2004; Luk et al., 2019; Shi and  
326 Wang, 2011), there are no reports so far describing the comparative molecular basis of the  
327 evolution, overtly for the spike protein CTDs with respect to the immediate and similar  
328 candidates such as Bat-CoV, SARS-CoV, and MERS-CoV. To establish and understand the  
329 molecular basis of infection for this pandemic strain along with other related coronaviruses  
330 are of utmost importance in the areas of- a) developing intervention, b) predicting the next  
331 strain in the course of evolution and c) develop an understanding of the changes in the  
332 virulence of the pandemic strains by analyzing the mutations observed. A recent report has  
333 established various mutations that are occurring in the pandemic strains and the current  
334 report can easily be extrapolated to include all the newer mutations to provide further insights  
335 into the virulence trend of the mutated strains (van Dorp et al., 2020). The novelty of the  
336 current study is that we have compared 45 verified sequences of Spike proteins from related  
337 coronaviruses to understand the unique and conserved segments of the spike proteins in order  
338 to decipher the structural and sequence similarities among the related coronaviruses to build  
339 a correlative basis.

340 The current study compared the spike protein sequences at amino acid (aa) and genomic  
341 nucleotide (nt) sequences. The comparison unequivocally established the corroboration of  
342 two independent analyses (aa and nt levels) and the analysis validated the results to reveal  
343 fact that SARS-CoV-2 is more similar to SARS-CoV-1 than other two closely related  
344 coronaviruses (Bat-CoV and MERS-CoV). Also, the significant conservation of amino  
345 in the S2 fragment of the Spike protein might be indicative of the conservation of the viral  
346 entry mechanism utilized by various coronaviruses irrespective of the host identity and the  
347 corresponding host receptor molecule. Our analysis also indicates a purifying selection  
348 driving the evolution of SARS-CoV-2. Previous studies have demonstrated a positive effect  
349 of the GC content on the  $dN$  value, thereby driving a positive selection (Du et al., 2018;  
350 Meunier and Duret, 2004). This further strengthens the theory of a purifying selection, as  
351 evident by the lower GC content in SARS-CoV-2 Spike protein coding sequence. A higher  
352 GC content exerts higher energy demands at the nucleotide level while compensating for  
353 same by coding for energy efficient amino acids. This in turn makes the replication of



354 GC content genomes energy consuming, thus slowing the process genome replication and  
355 resultant viral replication. Structural, energetics and *in silico* mutational analyses further  
356 confirm the observation and establish the properties and locations of the binding residues  
357 Tyr453 to explain the higher affinity of SARS-CoV-2 for ACE2 receptor. We propose that  
358 the evolution of SARS-CoV-2 occurred in parallel yet independently of MERS-CoV,  
359 following a set of recombination and mutational events involving the genomes of the  
360 Bat-CoV and the SARS-CoV.

## 361 **5. Conclusions**

362 It is important to mention that the current study is the first of its kind to establish a  
363 comparative molecular basis on the evolution of SARS-CoV-2 to acquire its virulence and  
364 infectivity over other related coronaviruses. The work has the potential to merge with the  
365 other published data and transform the knowledgebase on SARS-CoV-2 in a newer  
366 dimension to predict upcoming outcomes and aid in the development of novel and effective  
367 interventions.

368 **Supplementary Materials:** The supplementary data are given in a separate compiled file. A  
369 brief description of the supplementary data. Figure S1: amino acid sequence, Figure S2: A  
370 maximum parsimony phylogeny tree, Figure S3: spike protein comparison, Figure S4:  
371 Superimposition of CTDs, Figure S5: Superimposition of NTDs, Figure S6: Surface  
372 representation of protein complex, Figure S7: Comparison of maximum parsimony and  
373 maximum likelihood, Figure S8: Heatmap of hierarchical clustering, Figure S9: Heatmap of  
374 dS values, Figure S10: multiple protein sequence alignment, Figure S11: multiple nucleotide  
375 sequence alignment, Figure S12: Comparison of codon usage, Table S1: List of spike  
376 proteins.

377 **Author Contributions:** KM and AD contributed equally to this work by performing all data  
378 analyses required. MA helped in MD simulation. PP supported the work by supervising KM;  
379 and BB supported the work by supervising AD and MA; and helped finalizing the  
380 manuscript. AD and PA drafted the manuscript. PA conceptualized, planned the execution  
381 and initiated the collaboration among NISER, NII and ILS and finalized the manuscript.

382 **Funding:** The current work was not supported by any extramural funding.

383 **Acknowledgments:** The infrastructural facility required to execute this study was supported  
384 by NISER, NII and ILS. KM and AD contributed equally to this work by performing all data  
385 analyses required. MA helped in MD simulation. PP supported the work by supervising KM;  
386 and BB supported the work by supervising AD and MA; and helped finalizing the  
387 manuscript. AD and PA drafted the manuscript. PA conceptualized, planned the execution  
388 and initiated the collaboration among NISER, NII and ILS and finalized the manuscript.

389 **Conflicts of Interest:** Authors declare no conflict of interest.

390

## 391 **References**

392

393 Acter, T., Uddin, N., Das, J., Akhter, A., Choudhury, T.R., Kim, S., 2020. Evolution of  
394 severe acute respiratory syndrome coronavirus 2 (SARS-CoV-2) as coronavirus disease  
395 2019 (COVID-19) pandemic: A global health emergency. *Sci. Total Environ.*  
396 <https://doi.org/10.1016/j.scitotenv.2020.138996>

- 397 Andersen, K.G., Rambaut, A., Lipkin, W.I., Holmes, E.C., Garry, R.F., 2020. The proximal  
398 origin of SARS-CoV-2. *Nat. Med.* <https://doi.org/10.1038/s41591-020-0820-9>
- 399 Ashour, H.M., Elkhatib, W.F., Rahman, M.M., Elshabrawy, H.A., 2020. Insights into the  
400 recent 2019 novel coronavirus (Sars-coV-2) in light of past human coronavirus  
401 outbreaks. *Pathogens.* <https://doi.org/10.3390/pathogens9030186>
- 402 Baker, F.B., 1974. Stability of two hierarchical grouping techniques case I: Sensitivity to data  
403 errors. *J. Am. Stat. Assoc.* 69, 440–445.  
404 <https://doi.org/10.1080/01621459.1974.10482971>
- 405 Baskaran, K., Duarte, J.M., Biyani, N., Bliven, S., Capitani, G., 2014. A PDB-wide,  
406 evolution-based assessment of protein-protein interfaces. *BMC Struct. Biol.* 14.  
407 <https://doi.org/10.1186/s12900-014-0022-0>
- 408 Benvenuto, D., Giovanetti, M., Ciccozzi, A., Spoto, S., Angeletti, S., Ciccozzi, M., 2020.  
409 The 2019-new coronavirus epidemic: Evidence for virus evolution. *J. Med. Virol.* 92,  
410 455–459. <https://doi.org/10.1002/jmv.25688>
- 411 Charif, D., Lobry, J.R., 2007. SeqinR 1.0-2: A Contributed Package to the R Project for  
412 Statistical Computing Devoted to Biological Sequences Retrieval and Analysis. pp.  
413 207–232. [https://doi.org/10.1007/978-3-540-35306-5\\_10](https://doi.org/10.1007/978-3-540-35306-5_10)
- 414 DeLano, W.L., 2020. The PyMOL Molecular Graphics System, Version 2.3. Schrödinger  
415 LLC. <https://doi.org/10.1038/hr.2014.17>
- 416 Du, M.Z., Zhang, C., Wang, H., Liu, S., Wei, W., Guo, F.B., 2018. The GC content as a main  
417 factor shaping the amino acid usage during bacterial evolution process. *Front.*  
418 *Microbiol.* 9. <https://doi.org/10.3389/fmicb.2018.02948>
- 419 Edgar, R.C., 2004. MUSCLE: Multiple sequence alignment with high accuracy and high  
420 throughput. *Nucleic Acids Res.* 32, 1792–1797. <https://doi.org/10.1093/nar/gkh340>
- 421 Galili, T., 2015. dendextend: An R package for visualizing, adjusting and comparing trees of  
422 hierarchical clustering. *Bioinformatics* 31, 3718–3720.  
423 <https://doi.org/10.1093/bioinformatics/btv428>
- 424 Giribet, G., 2005. TNT: Tree Analysis Using New Technology. *Syst. Biol.* 54, 176–178.  
425 <https://doi.org/10.1080/10635150590905830>
- 426 Gouet, P., Robert, X., Courcelle, E., 2005. ESPript/ENDscript: sequence and 3D information  
427 from protein structures. *Acta Crystallogr. Sect. A Found. Crystallogr.* 61, c42–c43.  
428 <https://doi.org/10.1107/s0108767305098211>
- 429 Heo, L., Lee, H., Seok, C., 2016. GalaxyRefineComplex: Refinement of protein-protein  
430 complex model structures driven by interface repacking. *Sci. Rep.* 6.  
431 <https://doi.org/10.1038/srep32153>

- 432 Holmes, E.C., Rambaut, A., 2004. Viral evolution and the emergence of SARS coronavirus.  
433 *Philos. Trans. R. Soc. London. Ser. B Biol. Sci.* 359, 1059–1065.  
434 <https://doi.org/10.1098/rstb.2004.1478>
- 435 Ingram, T., Mahler, D.L., 2013. SURFACE: Detecting convergent evolution from  
436 comparative data by fitting Ornstein-Uhlenbeck models with stepwise Akaike  
437 Information Criterion. *Methods Ecol. Evol.* 4, 416–425.  
438 <https://doi.org/10.1111/2041-210X.12034>
- 439 Jin, Y., Yang, H., Ji, W., Wu, W., Chen, S., Zhang, W., Duan, G., 2020. Virology,  
440 epidemiology, pathogenesis, and control of covid-19. *Viruses*.  
441 <https://doi.org/10.3390/v12040372>
- 442 Krüger, D.M., Gohlke, H., 2010. DrugScorePPI webserver: Fast and accurate in silico  
443 alanine scanning for scoring protein-protein interactions. *Nucleic Acids Res.* 38.  
444 <https://doi.org/10.1093/nar/gkq471>
- 445 Kumar, S., Stecher, G., Li, M., Knyaz, C., Tamura, K., 2018. MEGA X: Molecular  
446 evolutionary genetics analysis across computing platforms. *Mol. Biol. Evol.* 35,  
447 1547–1549. <https://doi.org/10.1093/molbev/msy096>
- 448 Lapointe, F.J., Legendre, P., 1995. Comparison tests for dendrograms: A comparative  
449 evaluation. *J. Classif.* <https://doi.org/10.1007/BF03040858>
- 450 Li, F., 2016. Structure, Function, and Evolution of Coronavirus Spike Proteins. *Annu. Rev.*  
451 *Virol.* 3, 237–261. <https://doi.org/10.1146/annurev-virology-110615-042301>
- 452 Li, Z., Natarajan, P., Ye, Y., Hrabe, T., Godzik, A., 2014. POSA: A user-driven, interactive  
453 multiple protein structure alignment server. *Nucleic Acids Res.* 42.  
454 <https://doi.org/10.1093/nar/gku394>
- 455 Luk, H.K.H., Li, X., Fung, J., Lau, S.K.P., Woo, P.C.Y., 2019. Molecular epidemiology,  
456 evolution and phylogeny of SARS coronavirus. *Infect. Genet. Evol.*  
457 <https://doi.org/10.1016/j.meegid.2019.03.001>
- 458 Meunier, J., Duret, L., 2004. Recombination drives the evolution of GC-content in the human  
459 genome. *Mol. Biol. Evol.* 21, 984–990. <https://doi.org/10.1093/molbev/msh070>
- 460 Moreira, I.S., Koukos, P.I., Melo, R., Almeida, J.G., Preto, A.J., Schaarschmidt, J., Trellet,  
461 M., Gümüş, Z.H., Costa, J., Bonvin, A.M.J.J., 2017. SpotOn: High Accuracy  
462 Identification of Protein-Protein Interface Hot-Spots. *Sci. Rep.* 7.  
463 <https://doi.org/10.1038/s41598-017-08321-2>
- 464 Negi, S.S., Schein, C.H., Oezguen, N., Power, T.D., Braun, W., 2007. InterProSurf: A web  
465 server for predicting interacting sites on protein surfaces. *Bioinformatics* 23,  
466 3397–3399. <https://doi.org/10.1093/bioinformatics/btm474>

- 467 Pierce, B.G., Wiehe, K., Hwang, H., Kim, B.H., Vreven, T., Weng, Z., 2014. ZDOCK server:  
468 Interactive docking prediction of protein-protein complexes and symmetric multimers.  
469 *Bioinformatics* 30, 1771–1773. <https://doi.org/10.1093/bioinformatics/btu097>
- 470 Posada, D., Crandall, K.A., 1998. MODELTEST: Testing the model of DNA substitution.  
471 *Bioinformatics* 14, 817–818. <https://doi.org/10.1093/bioinformatics/14.9.817>
- 472 Rocha, E.P.C., Smith, J.M., Hurst, L.D., Holden, M.T.G., Cooper, J.E., Smith, N.H., Feil,  
473 E.J., 2006. Comparisons of dN/dS are time dependent for closely related bacterial  
474 genomes. *J. Theor. Biol.* 239, 226–235. <https://doi.org/10.1016/j.jtbi.2005.08.037>
- 475 Rodrigues, C.H.M., Myung, Y., Pires, D.E.V., Ascher, D.B., 2019. MCSM-PPI2: predicting  
476 the effects of mutations on protein-protein interactions. *Nucleic Acids Res.* 47,  
477 W338–W344. <https://doi.org/10.1093/nar/gkz383>
- 478 Rothan, H.A., Byrareddy, S.N., 2020. The epidemiology and pathogenesis of coronavirus  
479 disease (COVID-19) outbreak. *J. Autoimmun.*  
480 <https://doi.org/10.1016/j.jaut.2020.102433>
- 481 Schliep, K.P., 2011. phangorn: Phylogenetic analysis in R. *Bioinformatics* 27, 592–593.  
482 <https://doi.org/10.1093/bioinformatics/btq706>
- 483 Shi, Z., Wang, L.F., 2011. Evolution of SARS Coronavirus and the relevance of modern  
484 Molecular Epidemiology, in: *Genetics and Evolution of Infectious Diseases*. Elsevier  
485 Inc., pp. 711–728. <https://doi.org/10.1016/B978-0-12-384890-1.00027-3>
- 486 Sievers, F., Higgins, D.G., 2014. Clustal Omega. *Curr. Protoc. Bioinforma.* 2014,  
487 3.13.1–3.13.16. <https://doi.org/10.1002/0471250953.bi0313s48>
- 488 Smith, M.R., 2020. Information theoretic Generalized Robinson-Foulds metrics for  
489 comparing phylogenetic trees. *Bioinformatics.*  
490 <https://doi.org/10.1093/bioinformatics/btaa614>
- 491 Sun, J., He, W.T., Wang, L., Lai, A., Ji, X., Zhai, X., Li, G., Suchard, M.A., Tian, J., Zhou, J.,  
492 Veit, M., Su, S., 2020. COVID-19: Epidemiology, Evolution, and Cross-Disciplinary  
493 Perspectives. *Trends Mol. Med.* 26, 483–495.  
494 <https://doi.org/10.1016/j.molmed.2020.02.008>
- 495 van Dorp, L., Acman, M., Richard, D., Shaw, L.P., Ford, C.E., Ormond, L., Owen, C.J.,  
496 Pang, J., Tan, C.C.S., Boshier, F.A.T., Ortiz, A.T., Balloux, F., 2020. Emergence of  
497 genomic diversity and recurrent mutations in SARS-CoV-2. *Infect. Genet. Evol.* 83,  
498 104351. <https://doi.org/10.1016/j.meegid.2020.104351>
- 499 Veeramalai, M., Ye, Y., Godzik, A., 2008. TOPS++FATCAT: Fast flexible structural  
500 alignment using constraints derived from TOPS+ Strings Model. *BMC Bioinformatics*  
501 9. <https://doi.org/10.1186/1471-2105-9-358>

- 502 Walls, A.C., Park, Y.-J., Tortorici, M.A., Wall, A., McGuire, A.T., Velesler, D., 2020.  
503 Structure, Function, and Antigenicity of the SARS-CoV-2 Spike Glycoprotein. *Cell*.  
504 <https://doi.org/https://doi.org/10.1016/j.cell.2020.02.058>
- 505 Wang, Qihui, Zhang, Y., Wu, L., Niu, S., Song, C., Zhang, Z., Lu, G., Qiao, C., Hu, Y.,  
506 Yuen, K.Y., Wang, Qisheng, Zhou, H., Yan, J., Qi, J., 2020. Structural and Functional  
507 Basis of SARS-CoV-2 Entry by Using Human ACE2. *Cell* 181, 894-904.e9.  
508 <https://doi.org/10.1016/j.cell.2020.03.045>
- 509 Wernersson, R., Pedersen, A.G., 2003. RevTrans: Multiple alignment of coding DNA from  
510 aligned amino acid sequences. *Nucleic Acids Res.* 31, 3537–3539.  
511 <https://doi.org/10.1093/nar/gkg609>
- 512 WHO, 2020. Coronavirus disease 2019 (COVID-19) Situation Report – 174.
- 513 Wrapp, D., Wang, N., Corbett, K.S., Goldsmith, J.A., Hsieh, C.-L., Abiona, O., Graham,  
514 B.S., McLellan, J.S., 2020. Cryo-EM structure of the 2019-nCoV spike in the prefusion  
515 conformation. *Science* (80-. ). 367, 1260 LP – 1263.  
516 <https://doi.org/10.1126/science.abb2507>
- 517 Xue, L.C., Rodrigues, J.P., Kastritis, P.L., Bonvin, A.M., Vangone, A., 2016. PRODIGY: A  
518 web server for predicting the binding affinity of protein-protein complexes.  
519 *Bioinformatics* 32, 3676–3678. <https://doi.org/10.1093/bioinformatics/btw514>
- 520 Yan, R., Zhang, Y., Li, Y., Xia, L., Guo, Y., Zhou, Q., 2020. Structural basis for the  
521 recognition of SARS-CoV-2 by full-length human ACE2. *Science* (80-. ). 367,  
522 1444–1448. <https://doi.org/10.1126/science.abb2762>
- 523 Yu, G., Smith, D.K., Zhu, H., Guan, Y., Lam, T.T.Y., 2017. Ggtree: an R Package for  
524 Visualization and Annotation of Phylogenetic Trees With Their Covariates and Other  
525 Associated Data. *Methods Ecol. Evol.* 8, 28–36.  
526 <https://doi.org/10.1111/2041-210X.12628>
- 527 Zhao, J., Yang, Y., Huang, H.-P., Li, D., Gu, D.-F., Lu, X.-F., Zhang, Z., Liu, L., Liu, T., Liu,  
528 Y.-K., He, Y.-J., Sun, B., Wei, M.-L., Yang, G.-Y., Wang, X., Zhang, L., Zhou, X.-Y.,  
529 Xing, M.-Z., Wang, P.G., 2020. Relationship between the ABO Blood Group and the  
530 COVID-19 Susceptibility. *medRxiv* 2020.03.11.20031096.  
531 <https://doi.org/10.1101/2020.03.11.20031096>

## 532 **Figure Legends**

533 **Figure 1: The 3-D structure comparison of Spike proteins of SARS-CoV and**  
534 **SARS-CoV2 and their interaction interfaces with human ACE2. (A)** A cartoon  
535 representation of the Spike protein trimer assembly depicting the position of sub-units S1 and



536 S2 and the membrane anchor (MA) region on the viral membrane (VM). **(B)** A  
537 superimposition of the C $\alpha$  chains for the complete spike protein from SARS-CoV2  
538 (lime-green); complete spike protein from SARS-CoV (tv-red); NTD of spike protein from  
539 Bov-CoV (cyan); CTD of spike protein from MERS-CoV (dark-grey) and CTD of spike  
540 protein from Bat-CoV (tv-blue). Of note, the CTD of the SARS-CoV2 is more compact as  
541 compared to SARS-CoV, MERS-CoV and BAT-CoV. **(C)** A superimposition of the NTD of  
542 the SARS-CoV2 and SARS-CoV bound to the human ACE2 - C $\alpha$  chain in left panel and  
543 secondary structures in right panel. (SARS-CoV2 in raspberry, CoV2 bound ACE2 in cyan;  
544 SARS-CoV in tv-green, CoV bound ACE2 in yellow). **(D)** A superimposition of the  
545 interacting regions of the NTD of the SARS-CoV2 and SARS-CoV and the human ACE2.  
546 (SARS-CoV2 in raspberry, CoV2 bound ACE2 receptor in cyan; SARS-CoV in tv-green,  
547 CoV bound ACE2 in yellow).

548

549 **Figure 2: Comparison of the amino acid residues of the Spike proteins of SARS-CoV2,**  
550 **SARS-CoV, MERS-CoV and Bat-CoV involved in interactions with human ACE2 (A)**  
551 Superimposition of the ACE2 binding residues of the CTD of SARS-CoV2 (raspberry) and  
552 SARS-CoV (pale green), with residues from each highlighted in sticks. (Crucial interacting  
553 residues from CoV2 marked in red arrows). **(B)** Superimposition of the ACE2 binding  
554 residues of the CTD of SARS-CoV2 (raspberry) and MERS-CoV (pale green), with residues  
555 from each highlighted in sticks. (Crucial interacting residue from CoV2 with identical  
556 superimposed residue from MERS-CoV marked in red arrow). **(C)** Superimposition of the

557 ACE2 binding residues of the CTD of SARS-CoV2 (raspberry) and Bat-CoV (pale green),  
558 with residues from each highlighted in sticks. (Crucial interacting residue from CoV2 with  
559 identical superimposed residue from MERS-CoV marked in red arrow). **(D)** *In silico* analine  
560 scanning shows the significance of Y453 from SARS-CoV2 CTD and its spatial conservation  
561 in MERS-CoV and Bat-CoV.

562

563 **Figure 3: A tanglegram comparison for the Spike protein amino acids and nucleotide**  
564 **phylogenies.** With an entanglement score of 0.22, the phylogenies suggest a strong  
565 concordance, suggesting that codon usage has negligible impact on the divergence of Spike  
566 proteins. (Dashed branches differ between both phylogenies and coloured clades are identical  
567 to both trees. Amino acid phylogeny in left panel and row matched Nucleotide phylogeny in  
568 the right panel).

569

570 **Figure 4: A heat map demonstration of the clustering of the  $dN - dS$  ratio for Spike**  
571 **protein coding ORFs.** The values suggest a mild purifying selection for SARS-CoV2 and a  
572 strong positive selection for MERS-CoV. (Values within SARS-CoV2, SARS-CoV,  
573 MERS-CoV and Bat-CoV are marked with a black dot).

574

575 **Figure 5: Exploring the selection pressure on the Spike protein CTDs of SARS-CoV2,**  
576 **SARS-CoV, MERS-CoV and Bat-CoV. (A)** Amino acid alignment of CTDs focussing on  
577 Y453 of SARS-CoV2 spike protein and its homologous residues. **(B)** Nucleotide alignment  
578 for the ORFs coding for the CTDs..  
579

**A**

bioRxiv preprint doi: <https://doi.org/10.1101/2020.12.03.409458>; this version posted December 3, 2020. The copyright holder for this preprint (which was not certified by peer review) is the author/funder. All rights reserved. No reuse allowed without permission.

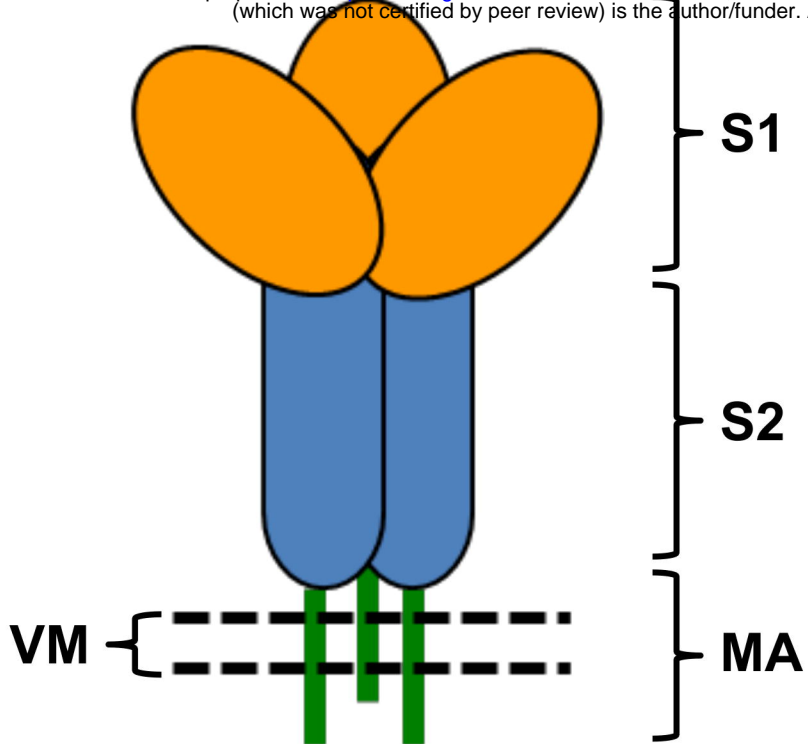**B**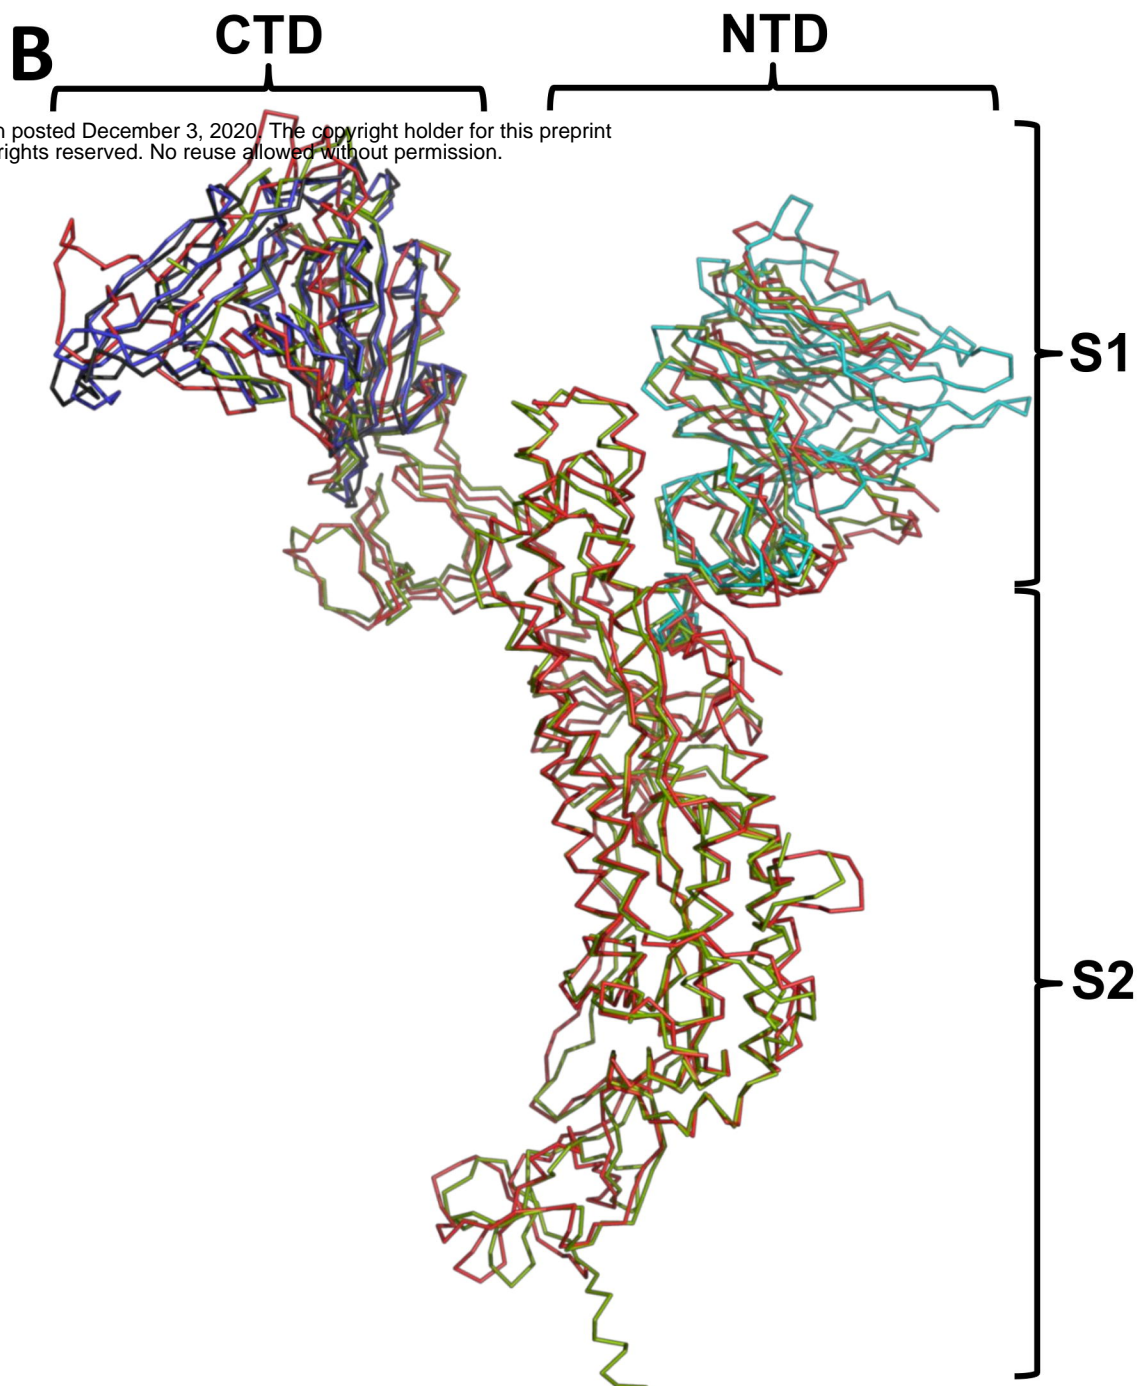**C**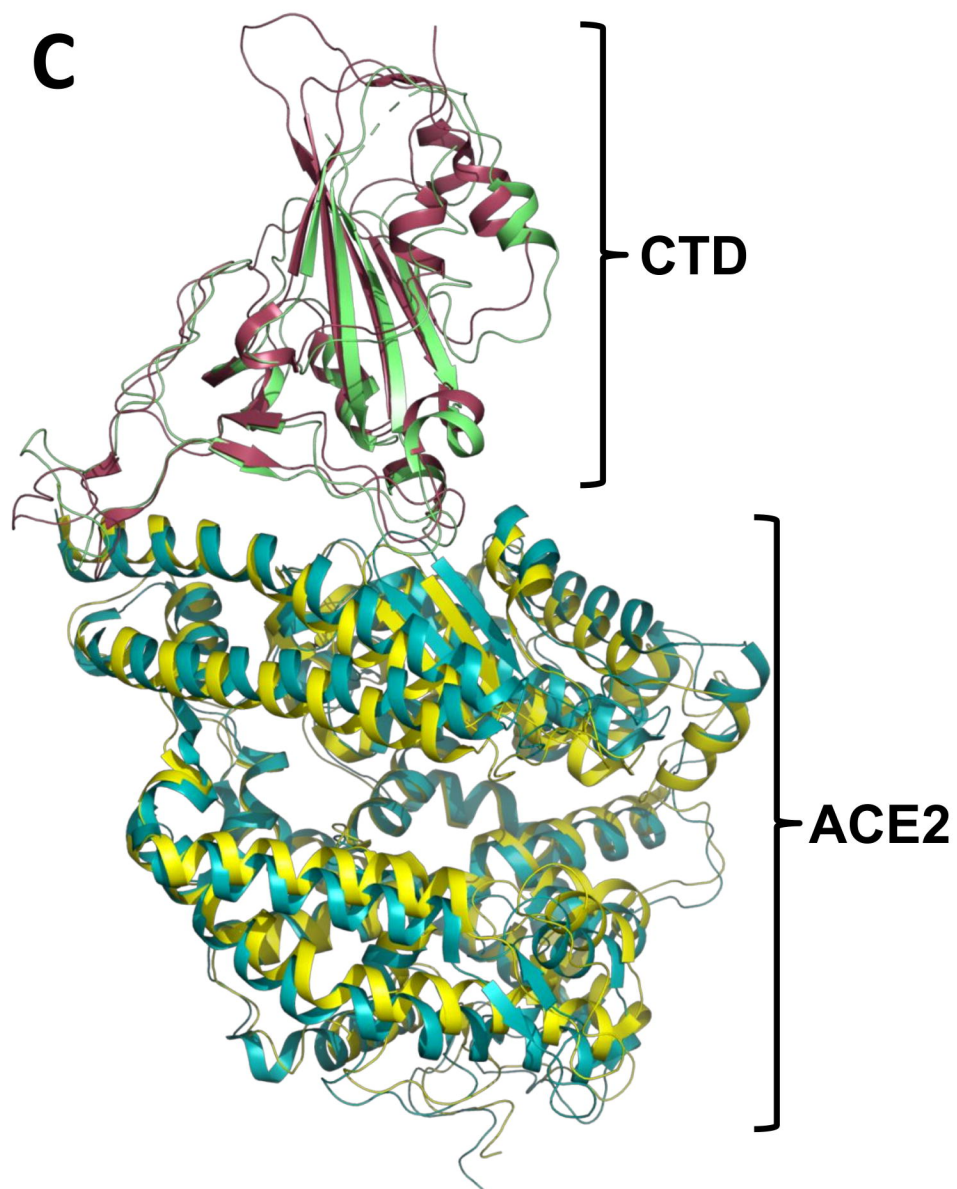**D**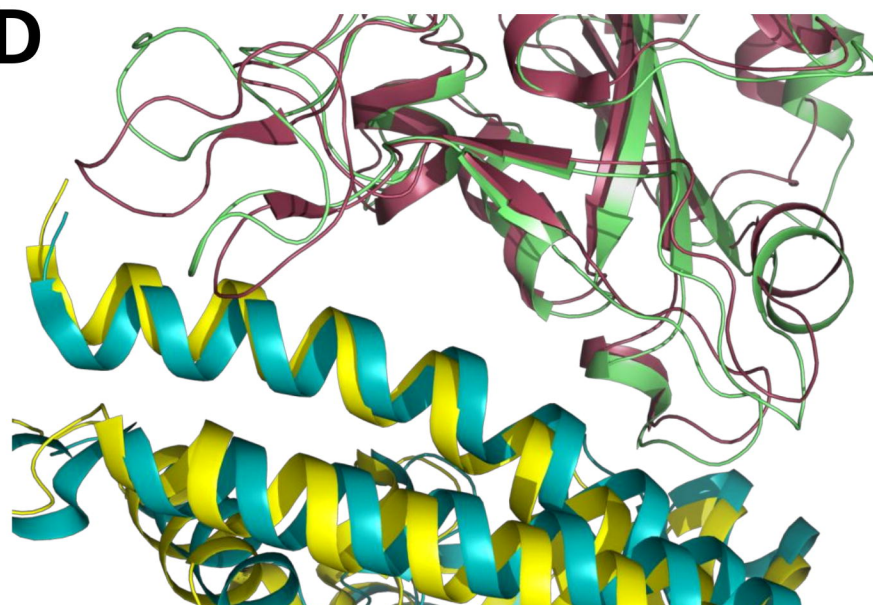



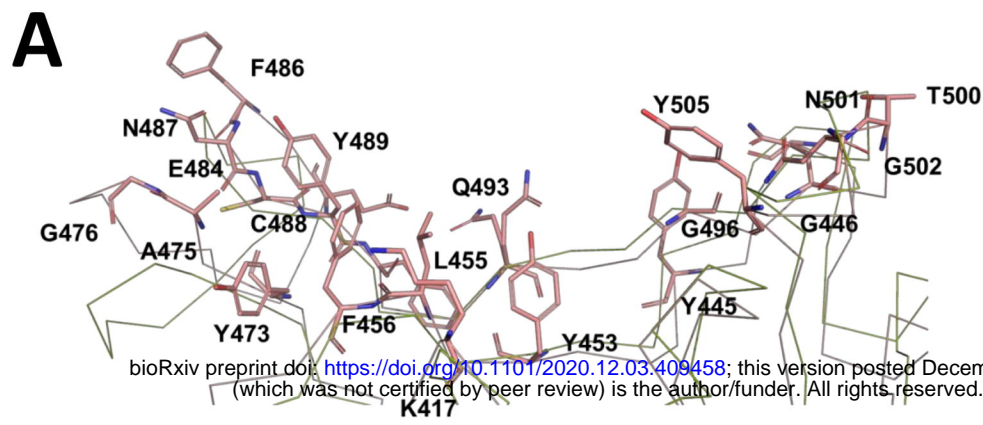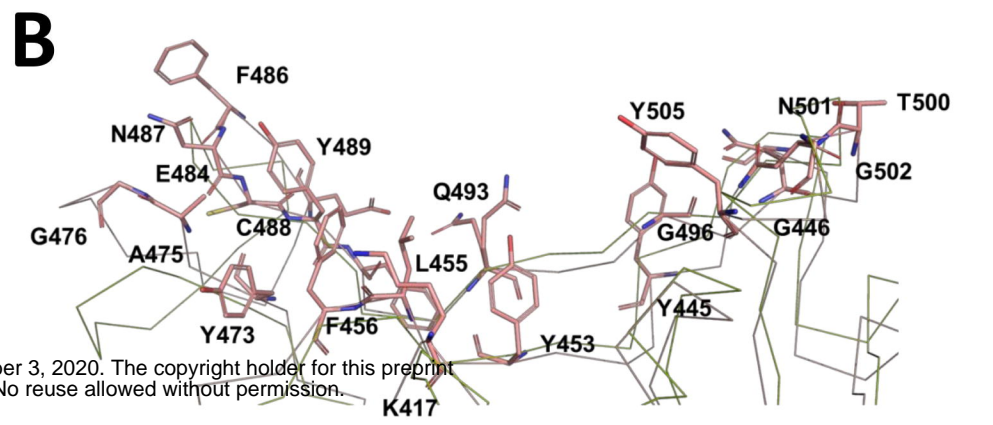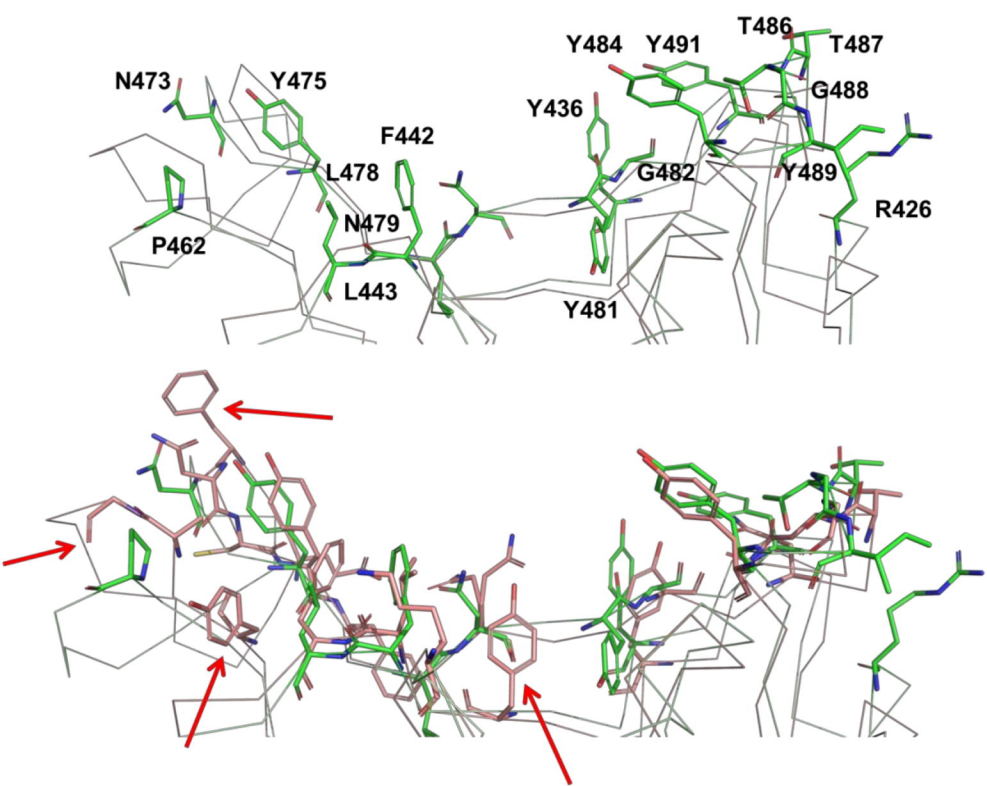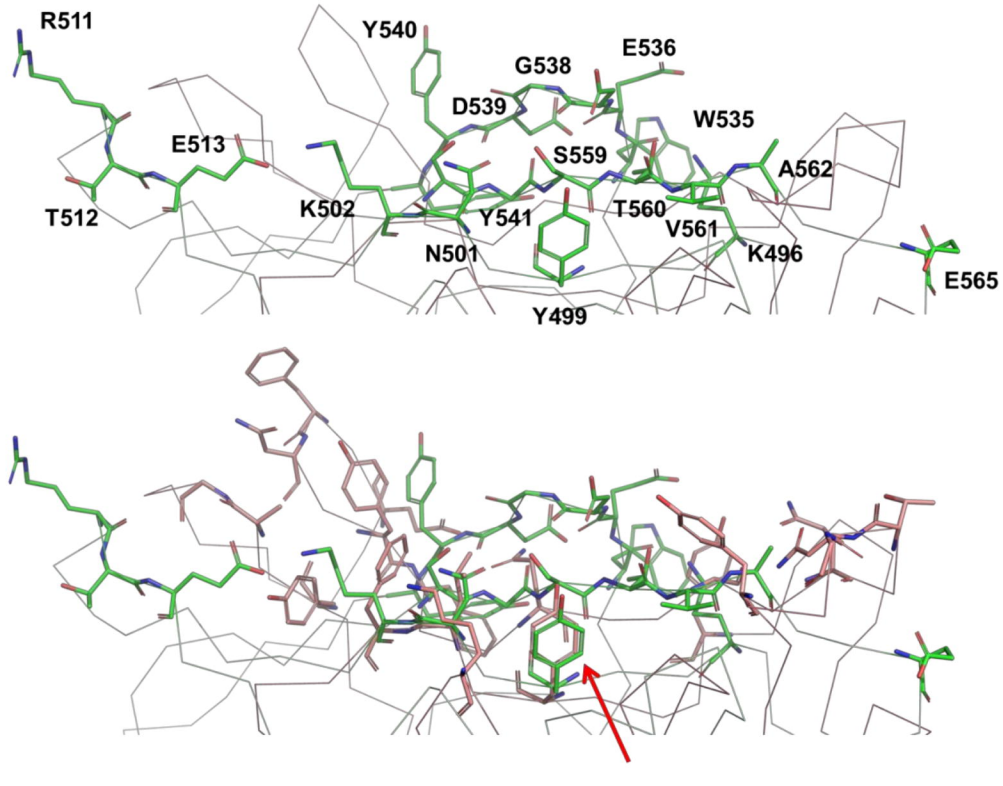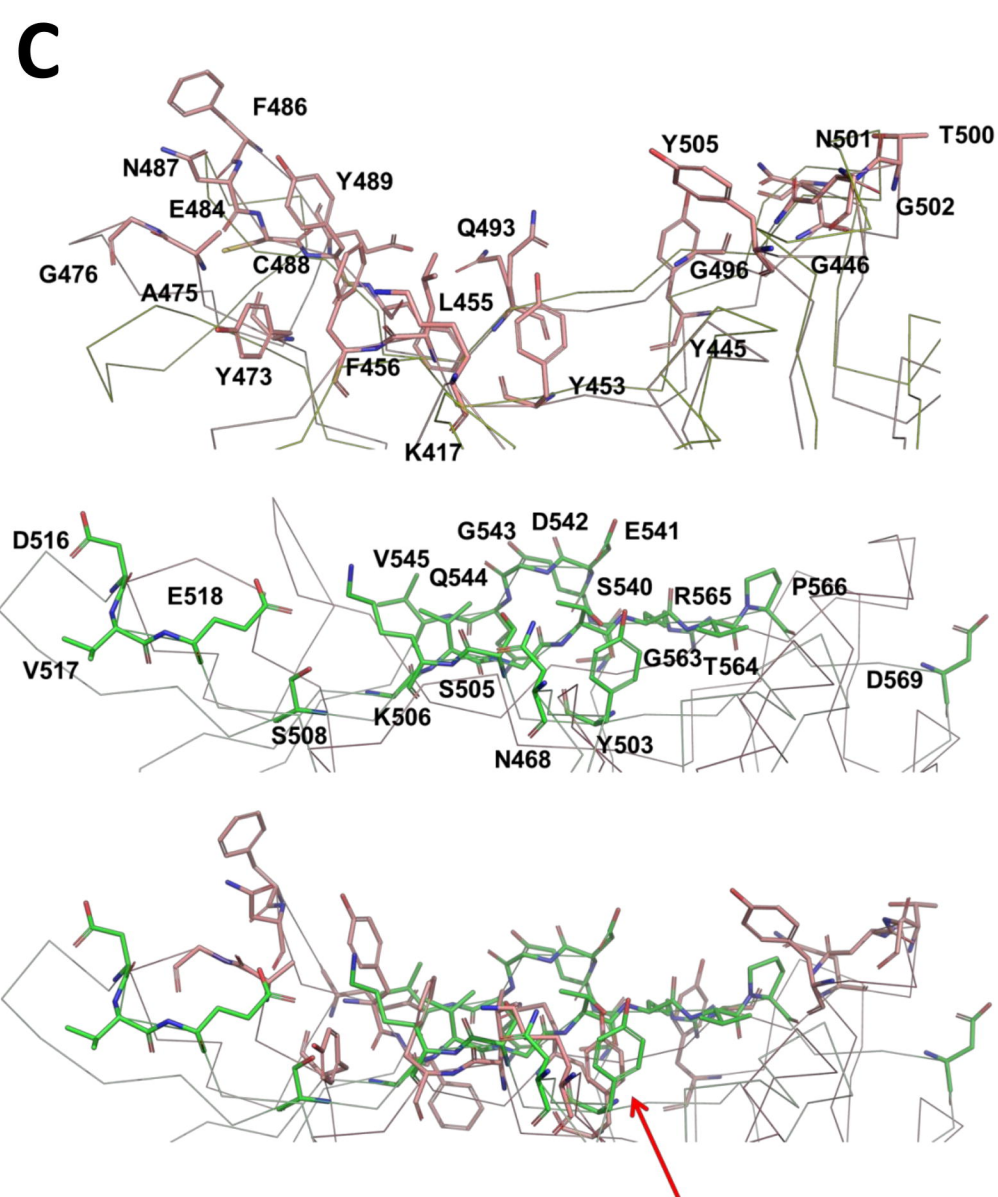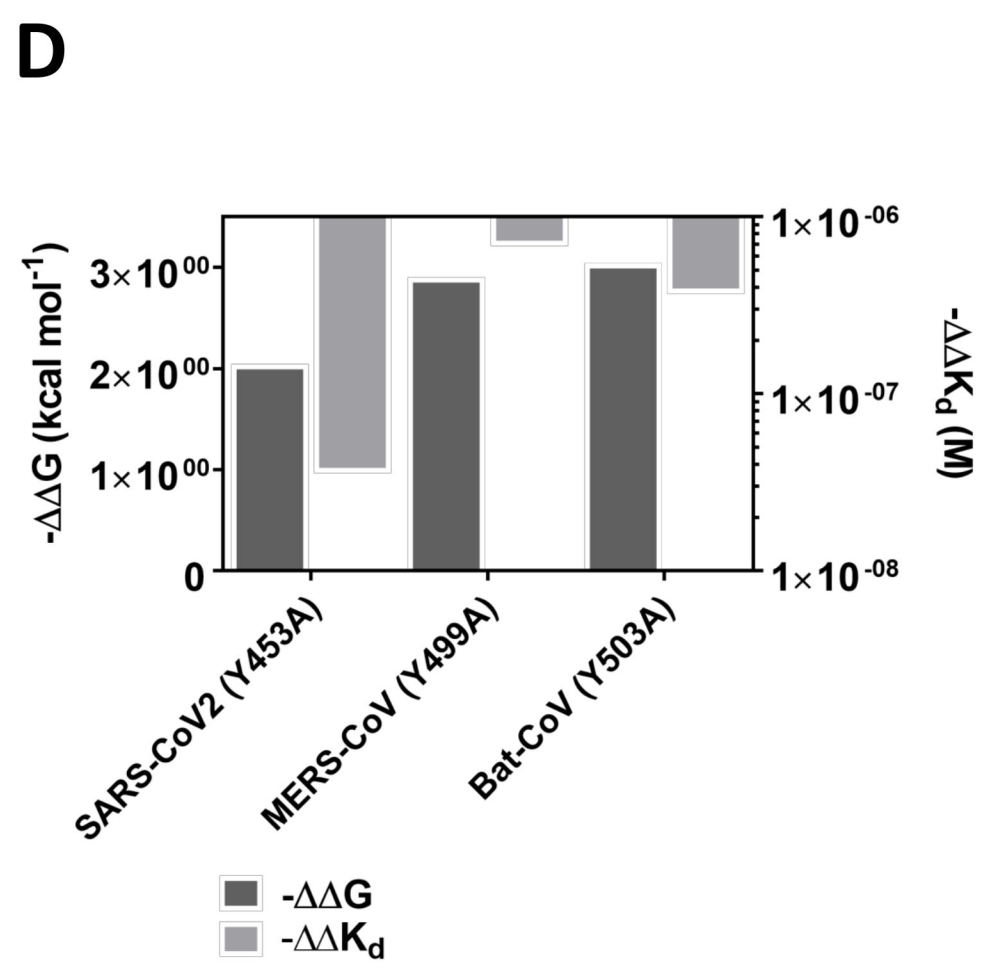



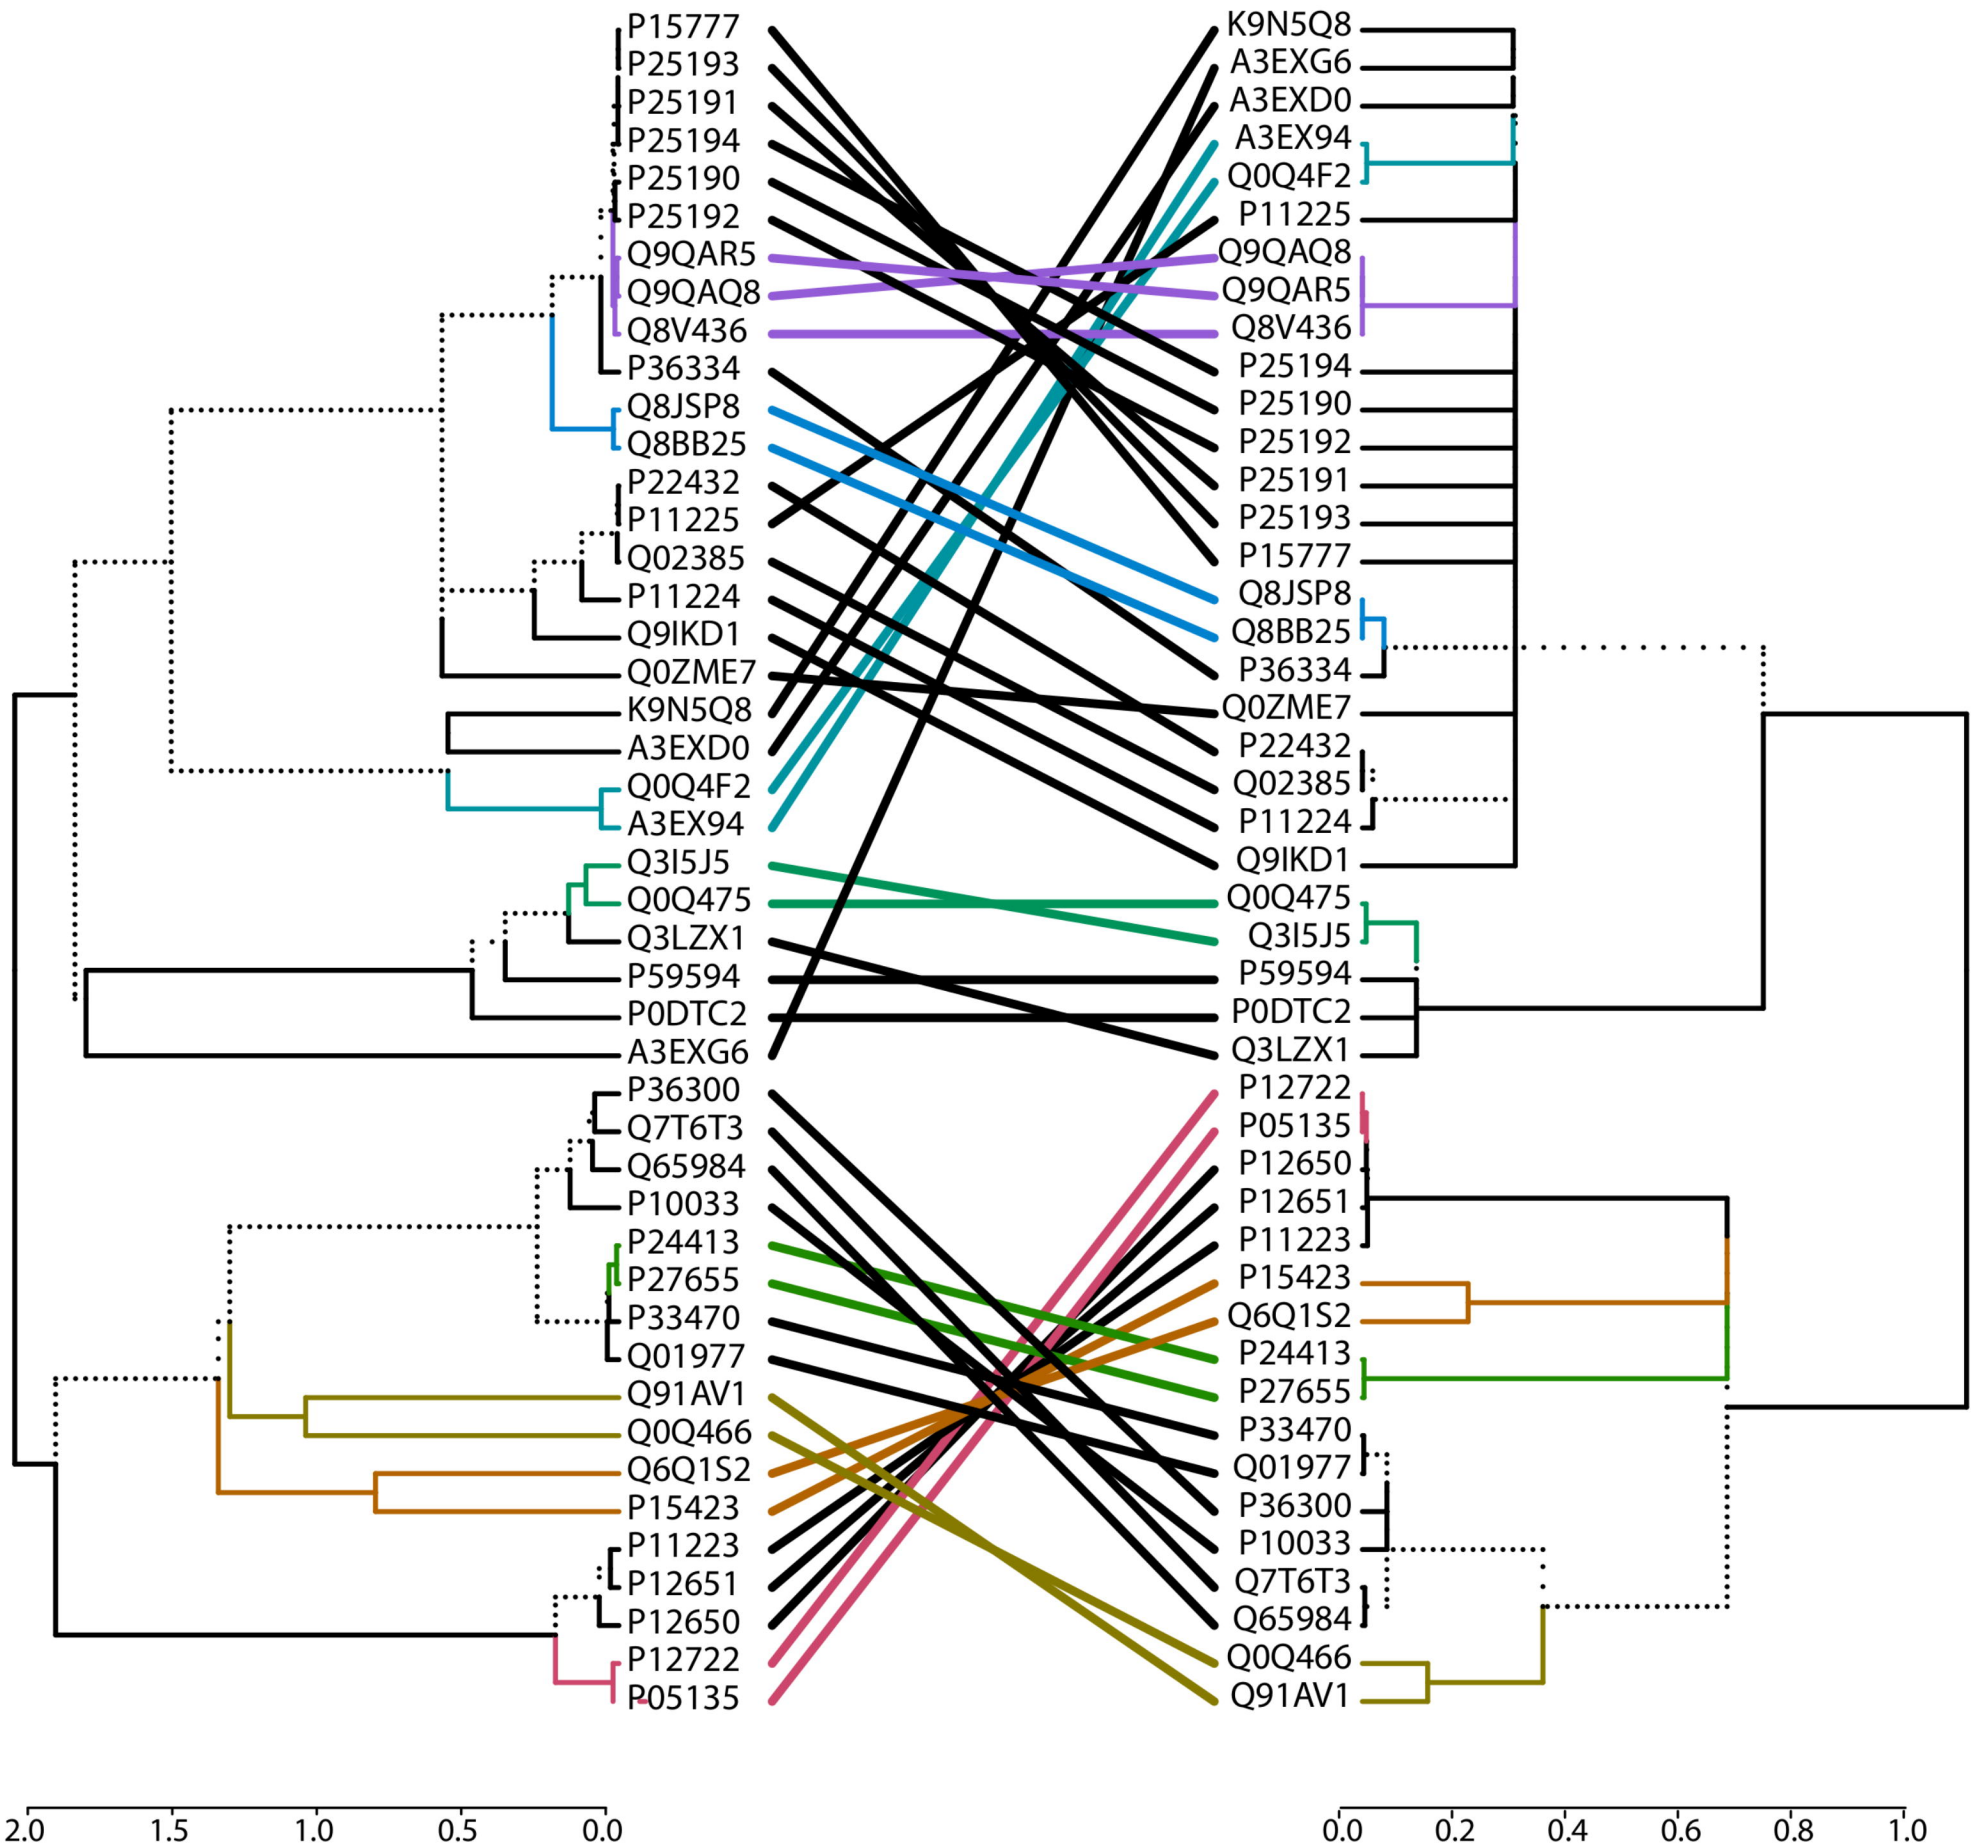

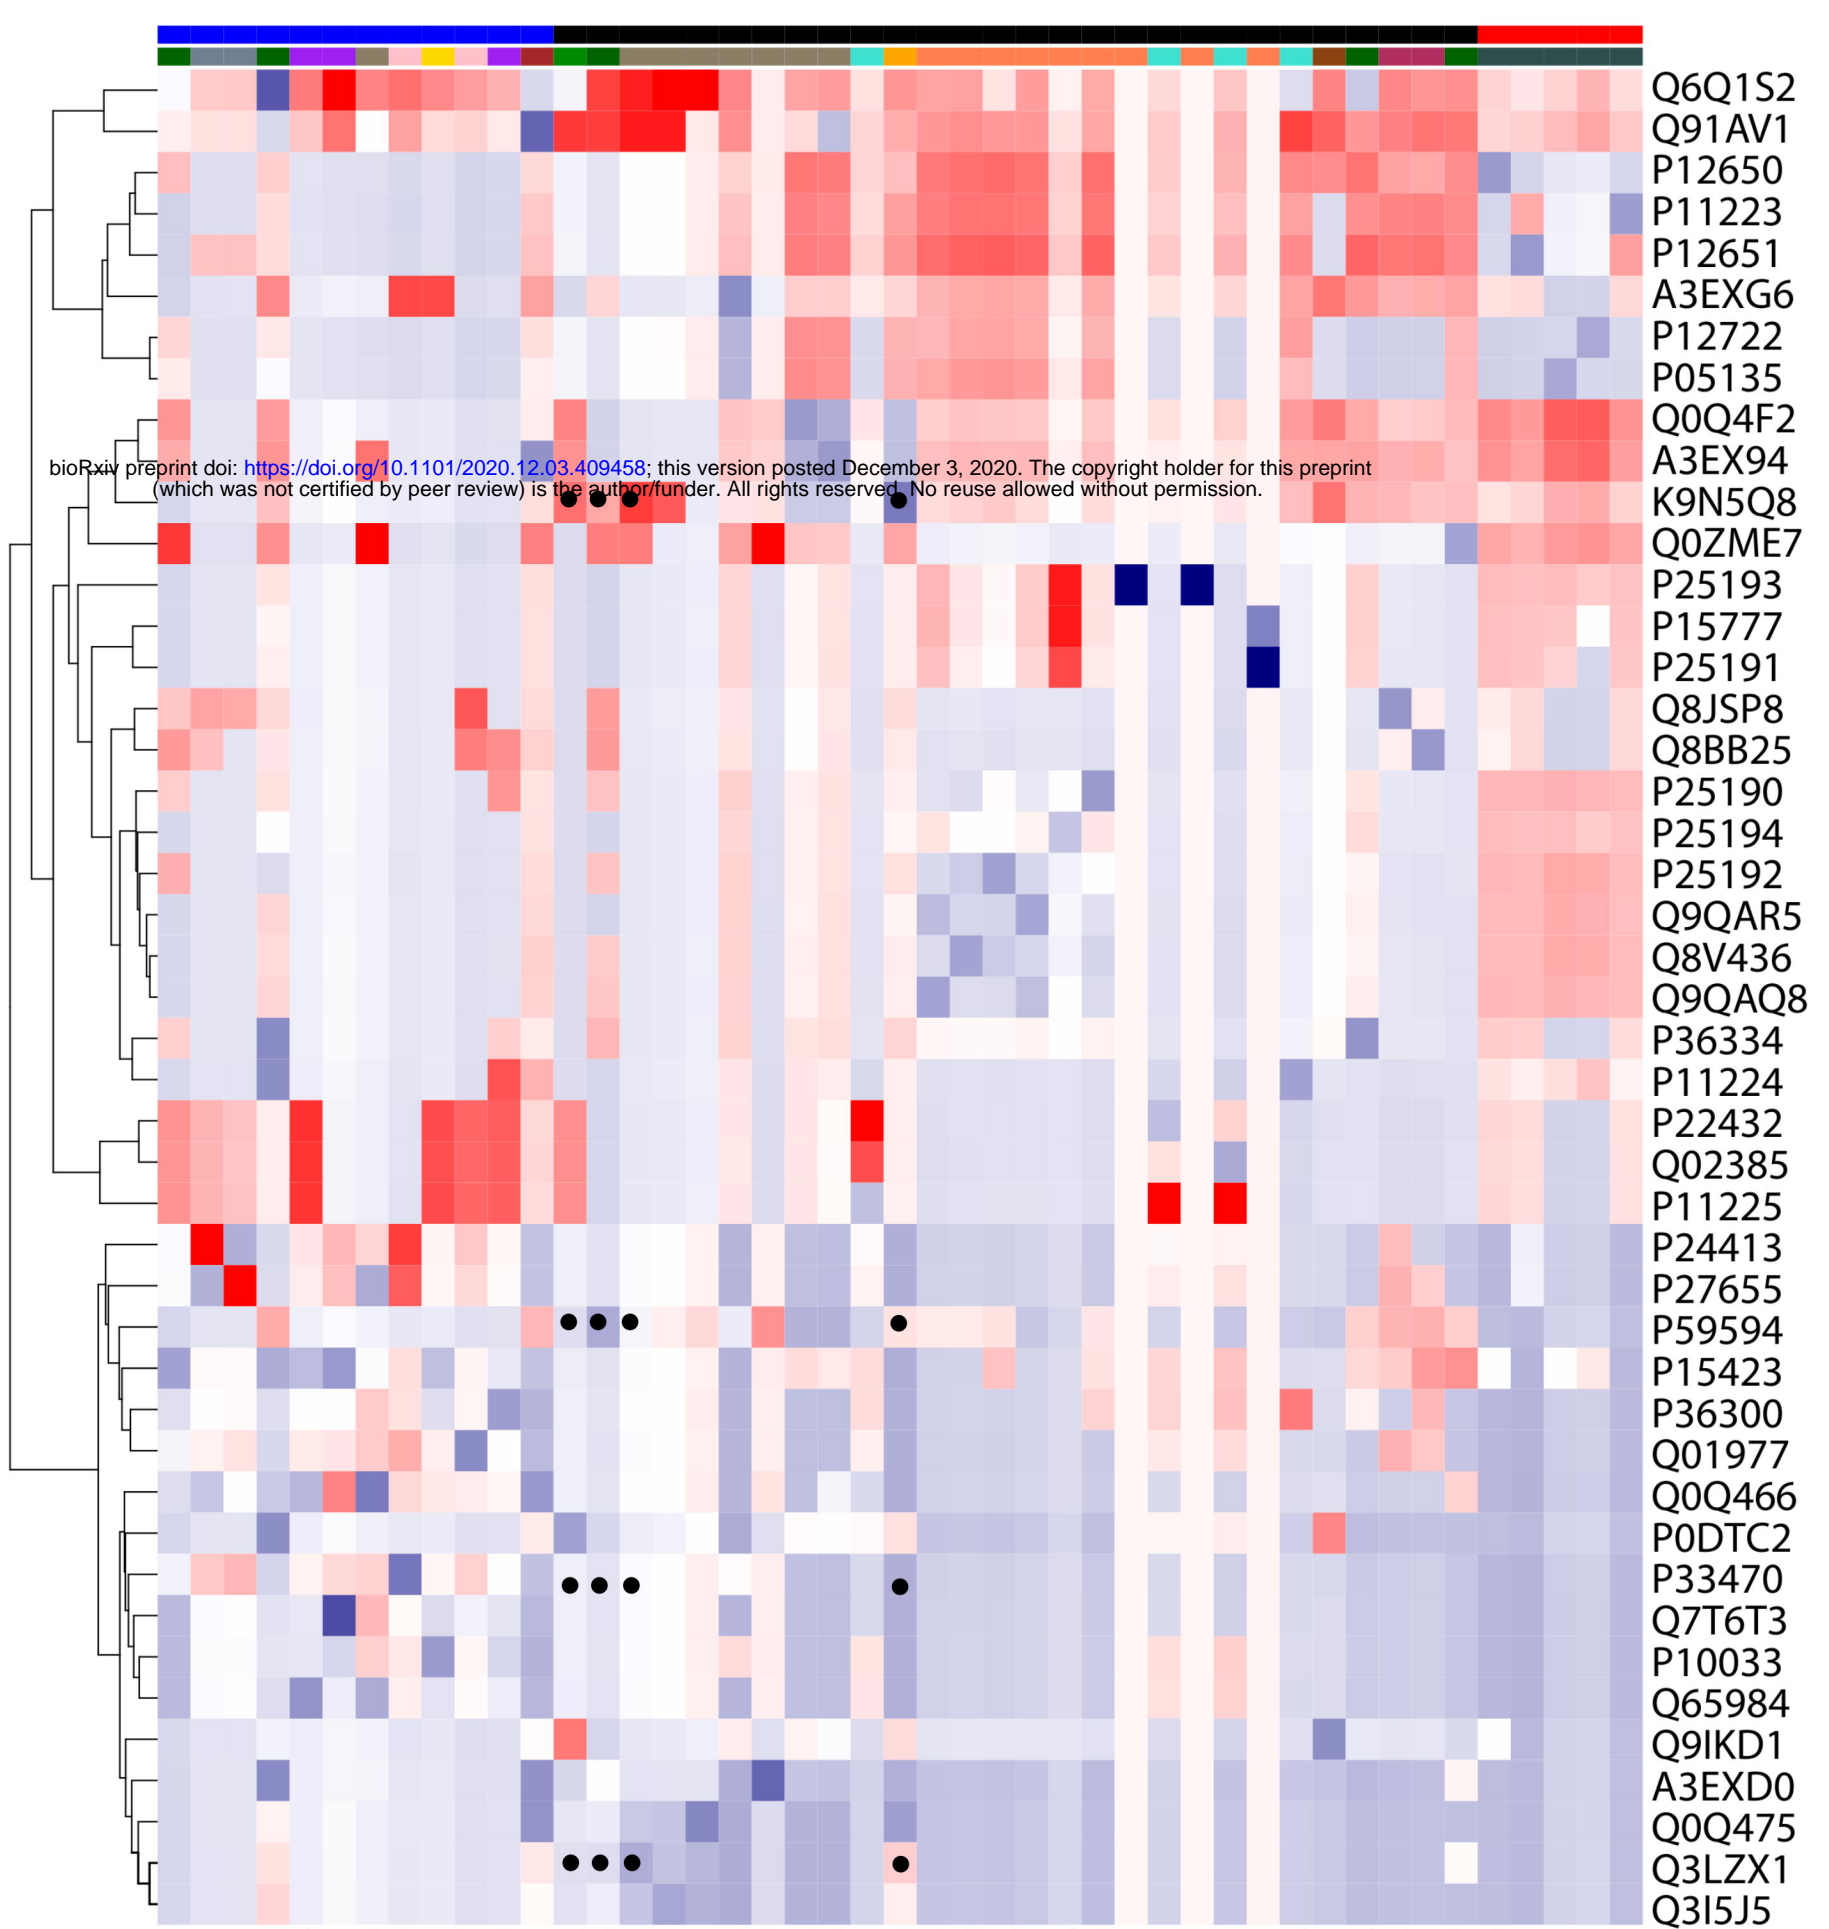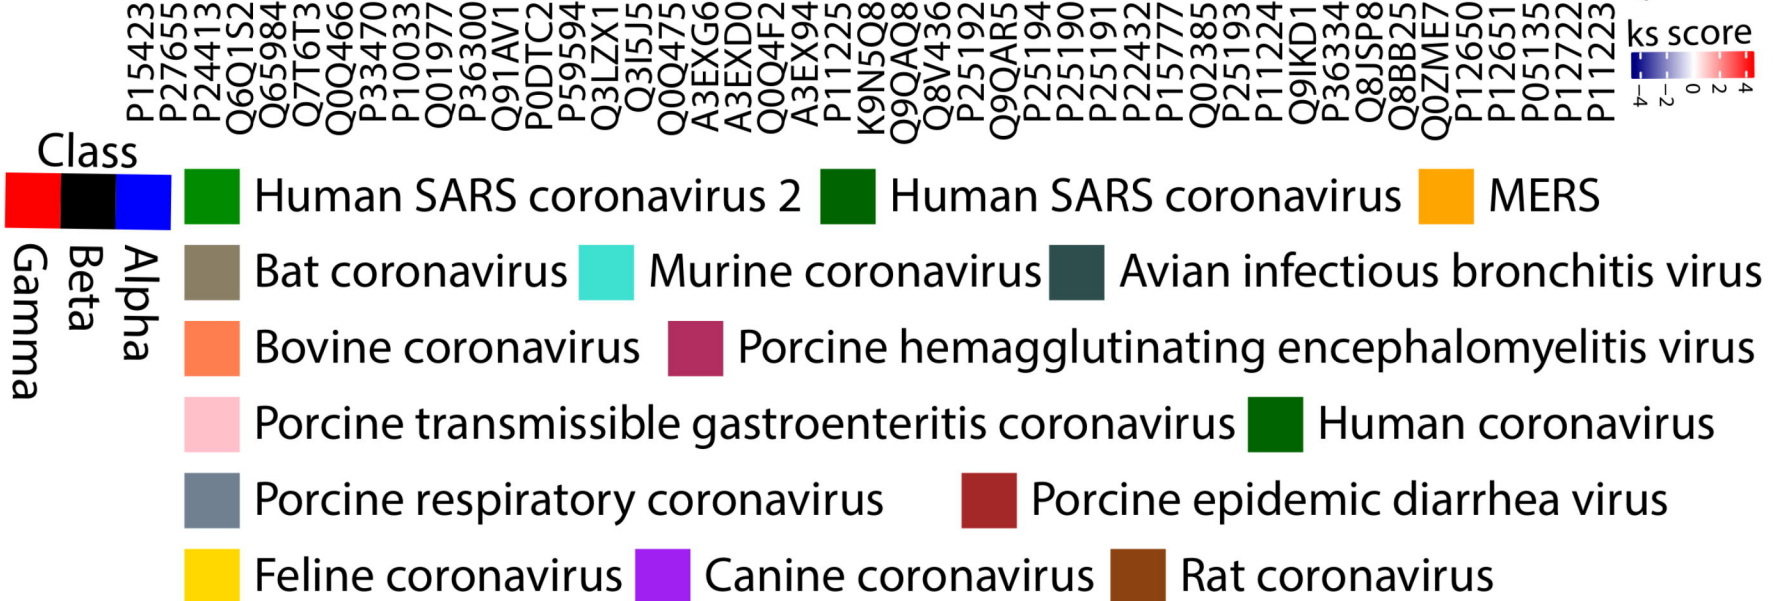

**A**

P0DTC2  
 P59594  
 K9N5Q8  
 Q3LZX1

432 C V I A W N S N N L D S K V G G N Y N Y L Y R L F R K S N L K P F E R D I S T  
 420 C V L A W N T R N I D A T S T G N Y N Y K Y R Y L R H G K L R P F E R D I S N  
 463 C L I L A T V P H N L T T I T K P L K Y S Y I N K C S R F L S D D R T E V P Q  
 469 C V I A W N T A K H D T . . . G . . N Y Y Y R S H R K T K L K P F E R D L S S

**B**

P0DTC2  
 P59594  
 K9N5Q8  
 Q3LZX1

1294 T G C G T T A T A G C T T G G A A T T C T A A C A A T C T T G A T T C T A A G G T T  
 1256 T G T G T C C T T G C T T G G A A T A C T A G G A A C A T T G A T G C T A C T T C A  
 1433 T G T T T G A T T T A G C G A C T G T T C C T C A T A A C C T T A C T A C T A T T  
 1268 T G T G T A A T T G C T T G G A A T A C T G C T A A A C A T G A T A C T . . . . .

P0DTC2  
 P59594  
 K9N5Q8  
 Q3LZX1

T T G G T G G T A A T T A T A A T T A C C T G T A T A G A T T G T T T A G G A A G T C T A  
 C A A C T G G T A A T T A T A A T T A T A A A T A T A G G T A T C T T A G A C A T G G C A  
 T T A C T A A G C C T C T T A A G T A C A G C T A T A T T A A C A A G T G C T C T C G T T  
 . . . . . G G C . . . . . A A T T A T T A C T A C A G A T C T C A T C G C A A G A C T A
